# Supplementary material
Source: HighWire-hosted journal article supplement (http://dmd.aspetjournals.org/highwire/filestream/75657/field_highwire_adjunct_files/0/DMD_000099R1_Supplemental_Table_1_.pdf)
Supplement: DMD_000099R1_Supplemental_Table_1_.pdf [file DMD_000099R1_Supplemental_Table_1_.pdf]

[Title] Impact of P-glycoprotein-mediated active efflux on drug distribution into lumbar cerebrospinal fluid in nonhuman primates

[Authors] Yoko Nagaya, Kazuhide Katayama, Hiroyuki Kusuhara, Yoshitane Nozaki

[Journal] Drug Metabolism and Disposition

[Manuscript number] DMD-AR-2020-000099

### Supplemental Table 1. Efflux ratio and % of control in in vitro P-gp inhibition study

The efflux ratio (ER) was calculated for desloratadine and quinidine from the ratio of the apparent permeability ( $P_{app}$ ) in basal-to-apical direction ( $P_{app,B-A}$ ) to that in apical-to-basal direction ( $P_{app,A-B}$ ) in the P-gp-expressing cells ( $ER_{P-gp}$ ) and control cells ( $ER_{Ctrl}$ ). The percentage of control values for P-gp-mediated transcellular transport ( $ER_{P-gp} - ER_{Ctrl}$ ) of desloratadine and quinidine in the presence of zosuquidar were calculated from the ER values as described in Materials and Methods.

#### (A) Desloratadine

| Zosuquidar<br>( $\mu\text{mol/L}$ ) | P-gp-expressing LLC-PK1 cells       |                                     |                  | Control LLC-PK1 cells               |                                     |                 | $ER_{P-gp} - ER_{Ctrl}$ | % of control                |
|-------------------------------------|-------------------------------------|-------------------------------------|------------------|-------------------------------------|-------------------------------------|-----------------|-------------------------|-----------------------------|
|                                     | $P_{app,A-B}$                       | $P_{app,B-A}$                       | $ER_{P-gp}$      | $P_{app,A-B}$                       | $P_{app,B-A}$                       | $ER_{Ctrl}$     |                         |                             |
|                                     | ( $\times 10^{-6} \text{ cm/sec}$ ) | ( $\times 10^{-6} \text{ cm/sec}$ ) |                  | ( $\times 10^{-6} \text{ cm/sec}$ ) | ( $\times 10^{-6} \text{ cm/sec}$ ) |                 |                         |                             |
| 0                                   | 2.44 $\pm$ 0.01                     | 31.65 $\pm$ 0.80                    | 12.97 $\pm$ 0.33 | 10.97 $\pm$ 0.40                    | 11.75 $\pm$ 0.27                    | 1.07 $\pm$ 0.05 | 11.90 $\pm$ 0.39        | 100.0 $\pm$ 4.3             |
| 0.0001                              | 2.65 $\pm$ 0.15                     | 29.12 $\pm$ 0.96                    | 10.99 $\pm$ 0.71 | 10.20 $\pm$ 0.91                    | 10.66 $\pm$ 0.51                    | 1.05 $\pm$ 0.11 | 9.94 $\pm$ 0.91         | 83.5 $\pm$ 8.5              |
| 0.001                               | 3.03 $\pm$ 0.15                     | 28.47 $\pm$ 1.04                    | 9.40 $\pm$ 0.59  | 10.65 $\pm$ 0.88                    | 10.66 $\pm$ 0.52                    | 1.00 $\pm$ 0.10 | 8.40 $\pm$ 0.87         | 70.6 $\pm$ 6.8              |
| 0.003                               | 4.60 $\pm$ 0.58                     | 27.89 $\pm$ 0.47                    | 6.06 $\pm$ 0.77  | 12.52 $\pm$ 0.38                    | 10.99 $\pm$ 0.38                    | 0.88 $\pm$ 0.04 | 5.18 $\pm$ 0.38         | 43.5 $\pm$ 2.0              |
| 0.01                                | 6.62 $\pm$ 0.39                     | 25.52 $\pm$ 0.51                    | 3.85 $\pm$ 0.24  | 11.36 $\pm$ 0.29                    | 10.41 $\pm$ 0.22                    | 0.92 $\pm$ 0.03 | 2.93 $\pm$ 0.29         | 24.6 $\pm$ 0.8              |
| 0.03                                | 9.99 $\pm$ 0.83                     | 18.04 $\pm$ 0.38                    | 1.81 $\pm$ 0.15  | 11.15 $\pm$ 0.86                    | 10.10 $\pm$ 0.59                    | 0.91 $\pm$ 0.09 | 0.90 $\pm$ 0.85         | 7.6 $\pm$ 0.7               |
| 0.1                                 | 12.42 $\pm$ 0.57                    | 13.65 $\pm$ 0.40                    | 1.10 $\pm$ 0.06  | 11.89 $\pm$ 1.11                    | 9.63 $\pm$ 0.07                     | 0.81 $\pm$ 0.08 | 0.29 $\pm$ 1.11         | 2.4 $\pm$ 0.2               |
| 1                                   | 16.63 $\pm$ 1.50                    | 15.59 $\pm$ 0.52                    | 0.94 $\pm$ 0.09  | 12.76 $\pm$ 1.13                    | 13.15 $\pm$ 0.54                    | 1.03 $\pm$ 0.10 | -0.09 $\pm$ 1.13        | -0.8 $\pm$ 0.1 <sup>a</sup> |

a: Handled as zero when estimating the  $IC_{50}$  value by least-squares nonlinear regression analysis.

## (B) Quinidine

| Zosuquidar<br>( $\mu\text{mol/L}$ ) | P-gp-expressing LLC-PK1 cells                      |                                                    |                    | Control LLC-PK1 cells                              |                                                    |                    | ER <sub>P-gp</sub> -ER <sub>Ctrl</sub> | % of control                |
|-------------------------------------|----------------------------------------------------|----------------------------------------------------|--------------------|----------------------------------------------------|----------------------------------------------------|--------------------|----------------------------------------|-----------------------------|
|                                     | P <sub>app,A-B</sub><br>( $\times 10^{-6}$ cm/sec) | P <sub>app,B-A</sub><br>( $\times 10^{-6}$ cm/sec) | ER <sub>P-gp</sub> | P <sub>app,A-B</sub><br>( $\times 10^{-6}$ cm/sec) | P <sub>app,B-A</sub><br>( $\times 10^{-6}$ cm/sec) | ER <sub>Ctrl</sub> |                                        |                             |
| 0                                   | 2.70 $\pm$ 0.60                                    | 39.52 $\pm$ 3.26                                   | 14.64 $\pm$ 3.26   | 15.86 $\pm$ 0.46                                   | 18.05 $\pm$ 0.54                                   | 1.14 $\pm$ 0.05    | 13.50 $\pm$ 0.6                        | 100.0 $\pm$ 4.2             |
| 0.0001                              | 1.88 $\pm$ 0.24                                    | 38.04 $\pm$ 2.59                                   | 20.23 $\pm$ 2.59   | 14.07 $\pm$ 1.35                                   | 16.91 $\pm$ 0.27                                   | 1.20 $\pm$ 0.12    | 19.03 $\pm$ 1.35                       | 141.0 $\pm$ 13.8            |
| 0.001                               | 2.18 $\pm$ 0.26                                    | 36.49 $\pm$ 2.01                                   | 16.74 $\pm$ 2.01   | 14.92 $\pm$ 0.80                                   | 16.80 $\pm$ 0.14                                   | 1.13 $\pm$ 0.06    | 15.61 $\pm$ 0.80                       | 115.6 $\pm$ 6.3             |
| 0.003                               | 2.98 $\pm$ 0.32                                    | 37.31 $\pm$ 1.36                                   | 12.52 $\pm$ 1.36   | 17.73 $\pm$ 0.75                                   | 17.67 $\pm$ 0.23                                   | 1.00 $\pm$ 0.04    | 11.52 $\pm$ 0.75                       | 85.3 $\pm$ 3.8              |
| 0.01                                | 4.25 $\pm$ 0.30                                    | 36.98 $\pm$ 0.63                                   | 8.70 $\pm$ 0.63    | 15.83 $\pm$ 0.28                                   | 16.39 $\pm$ 0.45                                   | 1.04 $\pm$ 0.03    | 7.66 $\pm$ 0.28                        | 56.7 $\pm$ 1.9              |
| 0.03                                | 8.23 $\pm$ 0.64                                    | 31.23 $\pm$ 0.30                                   | 3.79 $\pm$ 0.30    | 15.87 $\pm$ 0.25                                   | 16.07 $\pm$ 0.56                                   | 1.01 $\pm$ 0.04    | 2.78 $\pm$ 0.25                        | 20.6 $\pm$ 0.8              |
| 0.1                                 | 16.96 $\pm$ 0.44                                   | 22.50 $\pm$ 0.04                                   | 1.33 $\pm$ 0.04    | 16.70 $\pm$ 0.45                                   | 15.81 $\pm$ 0.27                                   | 0.95 $\pm$ 0.03    | 0.38 $\pm$ 0.45                        | 2.8 $\pm$ 0.1               |
| 1                                   | 23.38 $\pm$ 0.30                                   | 21.29 $\pm$ 0.03                                   | 0.91 $\pm$ 0.03    | 19.26 $\pm$ 0.63                                   | 18.39 $\pm$ 0.23                                   | 0.95 $\pm$ 0.03    | -0.04 $\pm$ 0.63                       | -0.3 $\pm$ 0.0 <sup>a</sup> |

a: Handled as zero when estimating the IC<sub>50</sub> value by least-squares nonlinear regression analysis.
